# Supplementary material
Source: HighWire-hosted journal article supplement (https://bmjopen.bmj.com/content/9/8/e028039)
Supplement: inline-supplementary-material-1 [file inline-supplementary-material-1.pdf]

**Appendix 1.** Adjusted incidence-density ratios (IDR) in a multivariate unilevel model for the imputed associations between cyclist-related variables and the risk of death in the first 24 hours after a road crash. Spain, 1993-2013.

| Variable                     | Category                   | IDR  | 95% CI |      | P value | FMI(2) |
|------------------------------|----------------------------|------|--------|------|---------|--------|
| Helmet use                   | Yes(1)                     | 1    | -      | -    | -       | -      |
|                              | No                         | 1.41 | 1.23   | 1.62 | <0.001  | 0.091  |
| Age (years)                  | < 10                       | 0.93 | 0.58   | 1.47 | 0.744   | 0.020  |
|                              | 10 a 14                    | 1.02 | 0.75   | 1.38 | 0.904   | 0.038  |
|                              | 15 a 19                    | 1.13 | 0.85   | 1.50 | 0.389   | 0.036  |
|                              | 20 a 24                    | 0.98 | 0.71   | 1.34 | 0.879   | 0.046  |
|                              | 25 a 29(1)                 | 1    | -      | -    | -       | -      |
|                              | 30 a 34                    | 1.27 | 0.94   | 1.73 | 0.124   | 0.057  |
|                              | 35 a 39                    | 1.81 | 1.36   | 2.41 | <0.001  | 0.035  |
|                              | 40 a 44                    | 1.68 | 1.25   | 2.26 | 0.001   | 0.039  |
|                              | 45 a 49                    | 1.85 | 1.37   | 2.49 | <0.001  | 0.036  |
|                              | 50 a 54                    | 2.15 | 1.59   | 2.90 | <0.001  | 0.029  |
|                              | 55 a 59                    | 2.92 | 2.18   | 3.91 | <0.001  | 0.033  |
|                              | 60 a 64                    | 3.55 | 2.67   | 4.72 | <0.001  | 0.034  |
|                              | 65 a 69                    | 4.43 | 3.38   | 5.81 | <0.001  | 0.034  |
|                              | 70 a 74                    | 3.57 | 2.55   | 4.99 | <0.001  | 0.028  |
|                              | > 74                       | 4.48 | 3.39   | 5.91 | <0.001  | 0.038  |
| Sex                          | Male(1)                    | 1    | -      | -    | -       | -      |
|                              | Female                     | 0.82 | 0.68   | 1.00 | 0.045   | 0.019  |
| Psychophysical circumstances | Normal(1)                  | 1    | -      | -    | -       | -      |
|                              | Altered                    | 1.44 | 1.09   | 1.90 | 0.011   | 0.309  |
| Nationality                  | Spanish(1)                 | 1    | REF    | REF  | REF     | REF    |
|                              | Other nationality          | 1.37 | 1.16   | 1.61 | <0.001  | 0.017  |
|                              | None(1)                    | 1    | -      | -    | -       | -      |
| Commission of infraction     | Distraction                | 0.71 | 0.57   | 0.89 | 0.002   | 0.005  |
|                              | Incorrect use of lighting  | 1.48 | 0.93   | 2.37 | 0.097   | 0.007  |
|                              | Wrong way                  | 1.19 | 0.78   | 1.82 | 0.423   | 0.004  |
|                              | Invading the opposite lane | 2.00 | 1.53   | 2.60 | <0.001  | 0.004  |
|                              | Incorrect turning          | 1.52 | 1.25   | 1.85 | <0.001  | 0.004  |
|                              | Illegal passing            | 2.12 | 1.28   | 3.49 | 0.003   | 0.001  |

|                    |                                          |      |      |       |        |        |
|--------------------|------------------------------------------|------|------|-------|--------|--------|
|                    | Disregarding safety distance             | 0.44 | 0.20 | 0.99  | 0.047  | 0.003  |
|                    | Failure to yield right of way            | 1.77 | 1.38 | 2.28  | <0.001 | 0.005  |
|                    | Disregarding traffic lights              | 1.44 | 0.87 | 2.39  | 0.161  | 0.016  |
|                    | Disregarding stop lights                 | 2.53 | 2.02 | 3.15  | <0.001 | 0.003  |
|                    | Disregarding crossing signals            | 1.65 | 1.02 | 2.66  | 0.041  | 0.001  |
|                    | Disregarding other signals               | 2.94 | 1.39 | 6.24  | 0.005  | 0.017  |
|                    | Not indicating a maneuver                | 1.19 | 0.53 | 2.66  | 0.679  | <0.001 |
|                    | Entering traffic flow without precaution | 1.94 | 1.37 | 2.74  | <0.001 | 0.004  |
|                    | Cycling while standing                   | 2.01 | 0.28 | 14.39 | 0.487  | <0.001 |
|                    | Cycling in parallel                      | 1.89 | 1.04 | 3.46  | 0.038  | 0.002  |
|                    | Cycling outside traffic lanes            | 2.09 | 1.64 | 2.66  | <0.001 | 0.004  |
|                    | Other                                    | 1.89 | 1.63 | 2.19  | <0.001 | 0.014  |
| Reason for cycling | Work-related(1)                          | 1    | -    | -     | -      | -      |
|                    | Other reason                             | 1.13 | 0.94 | 1.36  | 0.204  | 0.081  |

(1) Reference category

(2) Fraction of missing information
