# Supplementary material
Source: HighWire-hosted journal article supplement (https://bmjopen.bmj.com/content/9/8/e028039)
Supplement: inline-supplementary-material-2 [file inline-supplementary-material-2.pdf]

**Appendix 2.** Adjusted incidence-density ratios (IDR) in a multivariate unilevel model for the imputed associations between crash- and environment-related variables and the risk of death in the first 24 hours after a road crash. Spain, 1993-2013.

| Variable                     | Category                         | IDR  | 95% CI |      | P value | FMI(2) |
|------------------------------|----------------------------------|------|--------|------|---------|--------|
| Type of crash                | Collision with moving vehicle(1) | 1    | -      | -    | -       | -      |
|                              | Other                            | 0.89 | 0.78   | 1.00 | 0.058   | 0.014  |
| Traffic lane characteristics | Intersection(1)                  | 1    | -      | -    | -       | -      |
|                              | Other                            | 1.64 | 1.45   | 1.86 | <0.001  | 0.007  |
| Area                         | Highway(1)                       | 1    | -      | -    | -       | -      |
|                              | Urban area                       | 0.18 | 0.16   | 0.21 | <0.001  | 0.015  |
|                              | Community road                   | 0.59 | 0.47   | 0.74 | <0.001  | 0.003  |
| Meteorological conditions    | Good weather(1)                  | 1    | -      | -    | -       | -      |
|                              | Any adverse circumstances        | 1.37 | 1.08   | 1.73 | 0.009   | 0.005  |
| Road surface                 | Normal(1)                        | 1    | -      | -    | -       | -      |
|                              | Altered                          | 0.76 | 0.59   | 0.97 | 0.030   | 0.006  |
| Time of day (24-hour clock)  | 0:00-2:59(1)                     | 1    | -      | -    | -       | -      |
|                              | 3:00-5:59                        | 1.55 | 1.01   | 2.38 | 0.043   | 0.009  |
|                              | 6:00-8:59                        | 0.77 | 0.54   | 1.09 | 0.141   | 0.012  |
|                              | 9:00-11:59                       | 0.45 | 0.33   | 0.64 | <0.001  | 0.014  |
|                              | 12:00-14:59                      | 0.40 | 0.28   | 0.55 | <0.001  | 0.014  |
|                              | 15:00-17:59                      | 0.45 | 0.32   | 0.63 | <0.001  | 0.012  |
|                              | 18:00-20:59                      | 0.48 | 0.35   | 0.67 | <0.001  | 0.012  |
|                              | 21:00-23:59                      | 0.60 | 0.43   | 0.85 | 0.004   | 0.012  |
| Years                        | 2011 - 2013(1)                   | 1    | -      | -    | -       | -      |
|                              | 2008 - 2010                      | 1.34 | 1.07   | 1.69 | 0.010   | 0.012  |
|                              | 2005 - 2007                      | 2.10 | 1.70   | 2.60 | <0.001  | 0.015  |
|                              | 2002 - 2004                      | 2.16 | 1.75   | 2.68 | <0.001  | 0.012  |
|                              | 1999 - 2001                      | 2.42 | 1.96   | 2.98 | <0.001  | 0.010  |
|                              | 1996 - 1998                      | 2.31 | 1.87   | 2.85 | <0.001  | 0.012  |
|                              | 1993 - 1995                      | 2.67 | 2.17   | 3.29 | <0.001  | 0.015  |
| Province                     | Alava                            | 1    | -      | -    | -       | -      |
|                              | Albacete                         | 1.51 | 0.80   | 2.87 | 0.206   | 0.004  |
|                              | Alicante                         | 1.02 | 0.61   | 1.71 | 0.928   | 0.004  |
|                              | Almería                          | 1.61 | 0.92   | 2.83 | 0.095   | 0.006  |
|                              | Ávila                            | 0.29 | 0.07   | 1.25 | 0.097   | 0.001  |

|             |      |      |      |       |       |
|-------------|------|------|------|-------|-------|
| Badajoz     | 1.96 | 1.06 | 3.62 | 0.032 | 0.007 |
| Baleares    | 1.25 | 0.76 | 2.07 | 0.373 | 0.005 |
| Barcelona   | 1.01 | 0.62 | 1.64 | 0.974 | 0.009 |
| Burgos      | 1.35 | 0.76 | 2.43 | 0.308 | 0.003 |
| Cáceres     | 1.48 | 0.64 | 3.39 | 0.360 | 0.002 |
| Cádiz       | 1.04 | 0.56 | 1.91 | 0.907 | 0.007 |
| Castellón   | 1.08 | 0.61 | 1.91 | 0.798 | 0.005 |
| Ciudad Real | 1.28 | 0.71 | 2.31 | 0.417 | 0.005 |
| Córdoba     | 1.12 | 0.60 | 2.10 | 0.715 | 0.003 |
| Coruña, La  | 1.12 | 0.62 | 2.02 | 0.714 | 0.003 |
| Cuenca      | 2.95 | 1.45 | 6.02 | 0.003 | 0.003 |
| Girona      | 1.07 | 0.62 | 1.85 | 0.799 | 0.006 |
| Granada     | 1.18 | 0.66 | 2.10 | 0.584 | 0.005 |
| Guadalajara | 1.91 | 0.76 | 4.80 | 0.169 | 0.001 |
| Guipúzcoa   | 0.65 | 0.36 | 1.18 | 0.157 | 0.003 |
| Huelva      | 0.89 | 0.41 | 1.93 | 0.774 | 0.002 |
| Huesca      | 1.36 | 0.70 | 2.66 | 0.365 | 0.003 |
| Jaen        | 1.41 | 0.65 | 3.04 | 0.386 | 0.003 |
| León        | 1.49 | 0.88 | 2.54 | 0.140 | 0.004 |
| Lleida      | 1.38 | 0.75 | 2.57 | 0.302 | 0.003 |
| La Rioja    | 2.15 | 1.18 | 3.92 | 0.013 | 0.003 |
| Lugo        | 1.16 | 0.60 | 2.25 | 0.654 | 0.003 |
| Madrid      | 1.10 | 0.66 | 1.82 | 0.725 | 0.006 |
| Málaga      | 1.24 | 0.69 | 2.21 | 0.474 | 0.004 |
| Murcia      | 1.76 | 1.05 | 2.94 | 0.031 | 0.005 |
| Navarra     | 1.91 | 1.08 | 3.41 | 0.027 | 0.005 |
| Orense      | 1.96 | 1.04 | 3.67 | 0.037 | 0.003 |
| Asturias    | 0.76 | 0.43 | 1.33 | 0.335 | 0.004 |
| Palencia    | 1.24 | 0.63 | 2.42 | 0.537 | 0.004 |
| Palmas, Las | 1.70 | 0.93 | 3.08 | 0.084 | 0.003 |
| Pontevedra  | 0.96 | 0.52 | 1.75 | 0.886 | 0.003 |
| Salamanca   | 1.49 | 0.74 | 2.99 | 0.261 | 0.003 |
| Santa Cruz  | 1.43 | 0.76 | 2.73 | 0.270 | 0.003 |
| Cantabria   | 0.97 | 0.53 | 1.75 | 0.909 | 0.004 |
| Segovia     | 1.53 | 0.69 | 3.41 | 0.298 | 0.006 |
| Sevilla     | 1.38 | 0.82 | 2.35 | 0.230 | 0.003 |
| Soria       | 1.81 | 0.72 | 4.56 | 0.207 | 0.002 |
| Tarragona   | 1.52 | 0.91 | 2.54 | 0.111 | 0.005 |
| Teruel      | 1.77 | 0.74 | 4.24 | 0.201 | 0.002 |
| Toledo      | 2.37 | 1.36 | 4.12 | 0.002 | 0.003 |

|            |      |      |      |       |       |
|------------|------|------|------|-------|-------|
| Valencia   | 1.28 | 0.78 | 2.10 | 0.324 | 0.005 |
| Valladolid | 1.58 | 0.87 | 2.86 | 0.134 | 0.004 |
| Vizcaya    | 0.68 | 0.37 | 1.22 | 0.193 | 0.003 |
| Zamora     | 2.54 | 1.36 | 4.73 | 0.003 | 0.004 |
| Zaragoza   | 1.71 | 0.99 | 2.95 | 0.056 | 0.005 |

(1) Reference category  
(2) Fraction of missing information
